# Supplementary material for: Density Functional Theory Study of Mechanism of Reduction of N2O by CO over Fe-ZSM-5 Zeolites
Source: MDPI journal article supplement (doi:10.3390/catal14010049), 2024-01-10
Supplement: s1 [file s1]

## Supporting Information

The geometrically optimized energies for the different structures constructed as shown in Fig. 2 are as follows.

**Table S1. Detailed computational data for the binding energy of doped Fe on different active site structures**

| Type of site | E <sub>1</sub><br>(eV) | E <sub>2</sub><br>(eV) | E <sub>Fe</sub><br>(eV) | $\Delta E = E_2 - E_1 - E_{Fe}$ |            |
|--------------|------------------------|------------------------|-------------------------|---------------------------------|------------|
|              |                        |                        |                         | (eV)                            | (kcal/mol) |
| a site       |                        |                        |                         |                                 |            |
| a-1          | -2,589.3793            | -2,712.3029            | -122.6962               | -0.2274                         | -142.72    |
| a-2          | -2,589.3767            | -2,712.3136            | -122.6962               | -0.2407                         | -151.07    |
| a-3          | -2,542.2346            | -2,665.3629            | -122.6962               | -0.4321                         | -271.15    |
| b site       |                        |                        |                         |                                 |            |
| b-1          | -2,955.4190            | -3,078.3908            | -122.6962               | -0.2757                         | -173.01    |
| b-2          | -2,908.2844            | -3,031.4145            | -122.6962               | -0.4339                         | -272.26    |

The energies and reaction intermediates for the direct catalytic decomposition of N<sub>2</sub>O and the selective catalytic reduction reaction of N<sub>2</sub>O by CO on the a-structure are given below.

**Table S2. Energies of calculated results for reaction mechanisms on the a-structure.**

| Reaction        | Number   | State                     | Relative energy | Relative energy to the previous step |
|-----------------|----------|---------------------------|-----------------|--------------------------------------|
| <b>Part 1</b>   |          |                           |                 |                                      |
|                 | A1       | a+N <sub>2</sub> O        | 0.00            |                                      |
|                 | A2       | IM1-a-N <sub>2</sub> O    | -9.70           | -9.70                                |
|                 | a-TS1    | a-TS1                     | 17.14           | 26.85                                |
|                 | A3       | IM2-a-O*-N <sub>2</sub>   | -9.51           | -26.65                               |
|                 | A4       | a-O*+N <sub>2</sub>       | -6.11           | 3.39                                 |
| <b>Part 2-1</b> |          |                           |                 |                                      |
|                 | A5       | IM3-a-O*-N <sub>2</sub> O | -9.76           | -3.65                                |
|                 | a-TS2-I  | a-TS2-I                   | 26.70           | 36.46                                |
|                 | A6       | IM4-a-O*-O-N <sub>2</sub> | -39.76          | -66.46                               |
|                 | A7       | a-O*-O+N <sub>2</sub>     | -39.09          | 0.67                                 |
|                 | A8       | a-O <sub>2</sub>          | -26.11          | 12.98                                |
|                 | A9       | a+O <sub>2</sub>          | -37.97          | -11.86                               |
|                 | A10      | IM3-a-O*-N <sub>2</sub> O | -9.60           | -3.49                                |
|                 | a-TS2-II | a-TS2-II                  | 40.11           | 49.71                                |

|                 |                           |        |         |
|-----------------|---------------------------|--------|---------|
| A11             | IM4-a-O*-O-N <sub>2</sub> | -28.33 | -68.44  |
| A12             | a-O*-O+N <sub>2</sub>     | -25.66 | 2.67    |
| A13             | a-O <sub>2</sub>          | -26.04 | -0.38   |
| A14             | a+O <sub>2</sub>          | -37.97 | -11.92  |
| <b>Part 2-2</b> |                           |        |         |
| A15             | IM3-a-O*-CO               | -9.17  | -3.06   |
| a-TS2-          | a-TS2-CO                  | 6.72   | 15.89   |
| CO              |                           |        |         |
| A16             | IM4-a-CO <sub>2</sub>     | -96.74 | -103.46 |
| A17             | a+CO <sub>2</sub>         | -86.67 | 10.07   |

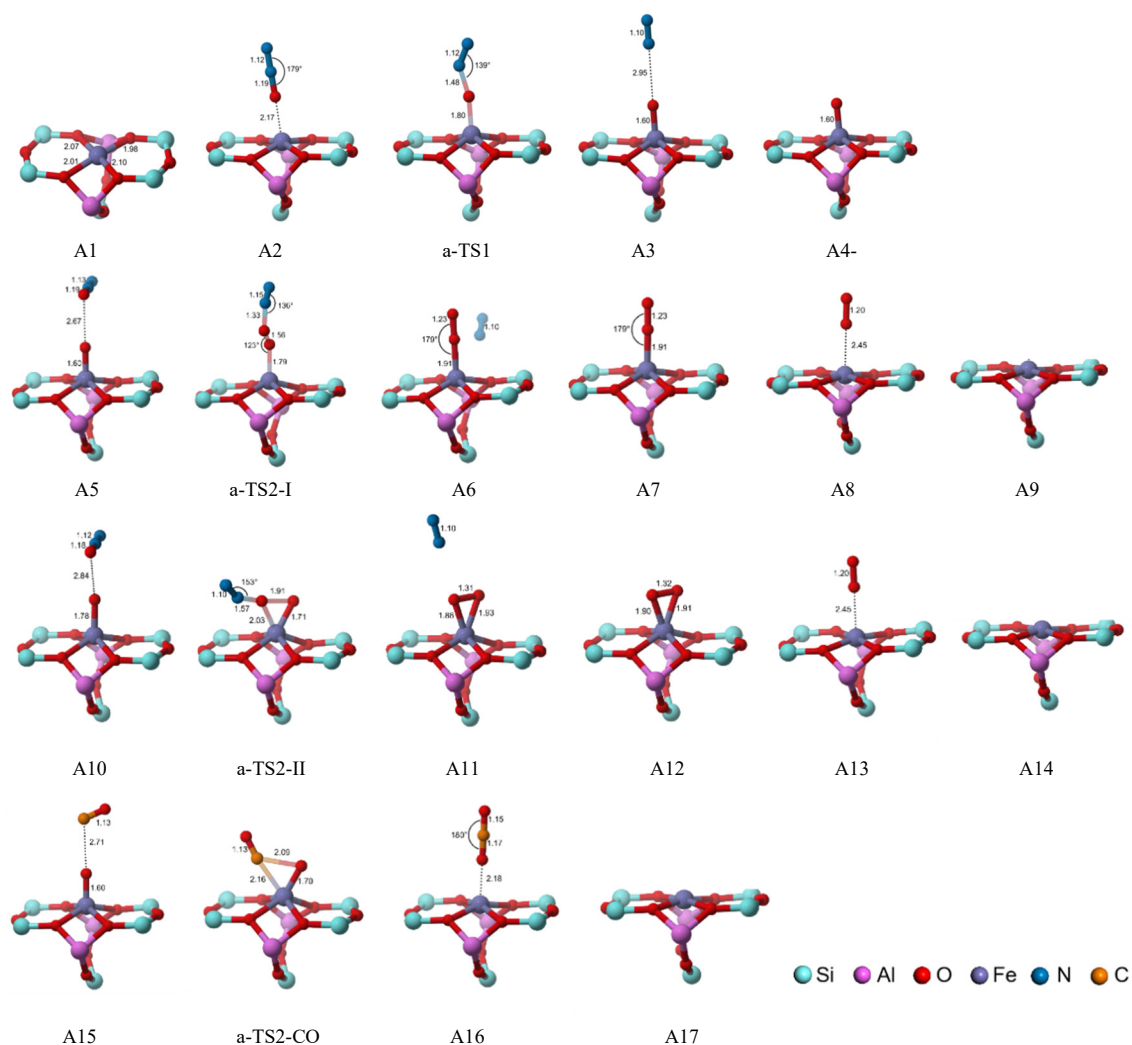

**Figure S1.** Reaction intermediates and transition states calculated by reaction mechanism on the a-structure (the unit of bond length is Å)

The energies and reaction intermediates for the direct catalytic decomposition of N<sub>2</sub>O and the selective catalytic reduction reaction of N<sub>2</sub>O by CO on the b-structure are given below.

**Table S3. Energies of calculated results for reaction mechanisms on the b-structures.**

| Reaction        | Number   | State                     | Relative energy | Relative energy to the previous step |
|-----------------|----------|---------------------------|-----------------|--------------------------------------|
| <b>Part 1</b>   |          |                           |                 |                                      |
|                 |          | TS1                       |                 |                                      |
|                 | B1       | b+N <sub>2</sub> O        | 0.00            |                                      |
|                 | B2       | IM1-b-N <sub>2</sub> O    | -11.64          | -11.64                               |
|                 | b-TS1    | b-TS1                     | 12.72           | 24.36                                |
|                 | B3       | IM2-b-O*-N <sub>2</sub>   | -13.09          | -25.81                               |
|                 | B4       | b-O*+N <sub>2</sub>       | -9.80           | 3.29                                 |
| <b>Part 2-1</b> |          |                           |                 |                                      |
|                 |          | TS2-I                     |                 |                                      |
|                 | B5       | IM3-b-O*-N <sub>2</sub> O | -16.51          | -6.71                                |
|                 | b-TS2-I  | b-TS2-I                   | 18.95           | 35.46                                |
|                 | B6       | IM4-b-O*-O-N <sub>2</sub> | -45.98          | -64.93                               |
|                 | B7       | b-O*-O+N <sub>2</sub>     | -45.06          | 0.92                                 |
|                 | B8       | b-O <sub>2</sub>          | -32.68          | 12.38                                |
|                 | B9       | b+O <sub>2</sub>          | -44.39          | -11.71                               |
|                 |          | TS2-II                    |                 |                                      |
|                 | B10      | IM3-b-O*-N <sub>2</sub> O | -16.81          | -7.01                                |
|                 | b-TS2-II | b-TS2-II                  | 34.04           | 50.86                                |
|                 | B11      | IM4-b-O*-O-N <sub>2</sub> | -36.35          | -70.40                               |
|                 | B12      | b-O*-O+N <sub>2</sub>     | -33.54          | 2.81                                 |
|                 | B13      | b-O <sub>2</sub>          | -32.91          | 0.63                                 |
|                 | B14      | b+O <sub>2</sub>          | -44.39          | -11.48                               |
| <b>Part 2-2</b> |          |                           |                 |                                      |
|                 |          | TS2-CO                    |                 |                                      |
|                 | B15      | IM3-b-O*-CO               | -12.74          | -2.94                                |
|                 | b-TS2-CO | b-TS2-CO                  | 3.23            | 15.97                                |
|                 | B16      | IM4-b-CO <sub>2</sub>     | -98.81          | -102.04                              |
|                 | B17      | b+CO <sub>2</sub>         | -89.88          | 8.93                                 |

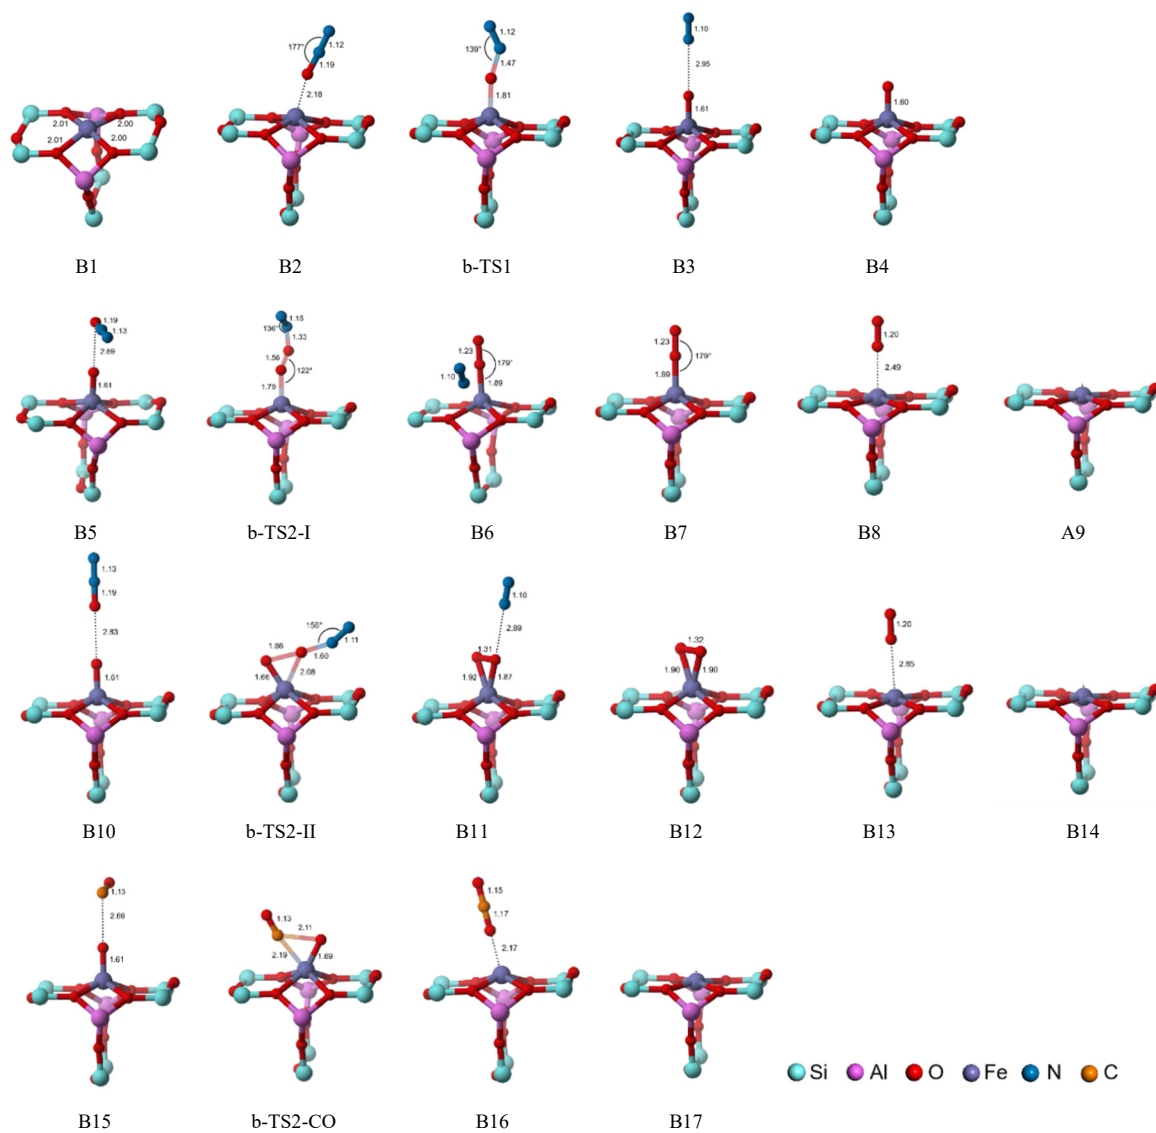

**Figure S2.** Reaction intermediates and transition states calculated by reaction mechanism on the b-structure(the unit of bond length is Å)

The atomic charge distribution of certain structures during reaction progress has been determined as follows.

**Table S4.** Charge distribution of N<sub>2</sub>O and CO molecules

| Molecule         | Atom    |         |         |
|------------------|---------|---------|---------|
| N <sub>2</sub> O | O       | N       | N       |
|                  | -0.1493 | 0.2335  | -0.0842 |
| CO               | C       | O       | /       |
|                  | 0.0841  | -0.0841 | /       |

**Table S5. Charge distribution of reaction intermediates and transition states for N<sub>2</sub>O decomposition over Z(Fe) of the a-structure**

| Number | Process | State                 | Atom   |         |        |         |
|--------|---------|-----------------------|--------|---------|--------|---------|
|        |         |                       | Fe     | O       | N      | N       |
| 1      |         | a                     | 0.4446 | /       | /      | /       |
| 2      | TS1     | a-N <sub>2</sub> O    | 0.3771 | -0.0556 | 0.2725 | -0.0126 |
| 3      |         | a-N <sub>2</sub> O-TS | 0.4959 | -0.1981 | 0.1474 | 0.0162  |
| 4      |         | a-O*-N <sub>2</sub>   | 0.5028 | -0.1716 | 0.0119 | -0.0014 |

The results of the computational tests with and without BSSE corrections of the a-structure are as follows

**Table S6. Partial interaction energies with and without BSSE correction of the a-structure**

| Number | State                       | Interaction energy (kcal/mol) |           |
|--------|-----------------------------|-------------------------------|-----------|
|        |                             | Without BSSE                  | With BSSE |
| A2     | N <sub>2</sub> O adsorption | -9.7                          | 0.92      |
| A3     | N <sub>2</sub> desorption   | 3.39                          | -0.53     |
| A5     | N <sub>2</sub> O adsorption | -3.65                         | 0.41      |
| A6     | N <sub>2</sub> desorption   | 0.67                          | -0.45     |
| A8     | O <sub>2</sub> desorption   | -11.86                        | -14.98    |
| A10    | N <sub>2</sub> O adsorption | -3.49                         | 0.24      |
| A11    | N <sub>2</sub> desorption   | 2.67                          | -0.74     |
| A13    | O <sub>2</sub> desorption   | -11.92                        | -8.89     |
| A15    | CO <sub>2</sub> adsorption  | -3.06                         | 0.32      |
| A16    | CO <sub>2</sub> desorption  | 10.07                         | 8.03      |
